# Supplementary material for: Long Noncoding RNA DRAIC Inhibits Prostate Cancer Progression by Interacting with IKK to Inhibit NF-κB Activation
Source: Oxford University Press journal article supplement (doi:10.1158/0008-5472.can-19-3460), 2020-01-03
Supplement: 00085472can193460-sup-231818_2_supp_5976701_q2tf2n.docx [file 00085472can193460-sup-231818_2_supp_5976701_q2tf2n.docx]

**Supplementary Figure Legends**

**Figure S1. DRAIC depletion led to increased NF-κB activity.** (A) LNCaP cells were transfected with two different concentrations of si787 and si226 (25 and 50 nM) against DRAIC or negative control (NC) followed by RT-qPCR analysis of DRAIC exprssion. DRAIC expression levels were normalized relative to GAPDH normalized to empty vector cells. Mean±s.d, n=3, *p<0.05. (B)LNCaP cells were transfected with two different concentrations of siRNA against DRAIC (si226) or negative control (NC) and cell lysates immunoblotted with antibodies against phospho IκBα, total IκBα and α-Tubulin.

**Figure S2. DRAIC KO validation.** Genomic DNA was isolated from the DRAIC

KO clones and the PCR product subjected to Sanger sequencing to validate the DRAIC deletion.

**Figure S3. Specificity of DRAIC’s association with IKK by depletion of IKK complex using siRNA and immunoprecipitation of the residual subunit of IKK complex in LNCaP cells. (**A-D) The RNA immunoprecipitates from LNCaP cells for (E) immunoblotted with antibodies against STAT3, TAK1, TBK1 and Pan Ago. (E) DRAIC association with each of the proteins (STAT3, TAK1, TBK1 and Ago) measured by RT-qPCR. Linc00152 serves as negative control. Mean±s.d, n=3, *p<0.05. (F) RIP assay from PC3M cells stably overexpressing DRAIC with anti-IKKα followed by RT-qPCR for MALAT1, PCA3, PCAT1, SchLp1, GAPDH, GSS1, Linc00152 and DRAIC. Mean±s.d, n=3, *p<0.05. (G) Input for Fig. 7D. LNCaP cells were transfected with siRNAs against two subunits of the IKK complex and immunoblotted with antibodies against IKKα, IKKβ, NEMO, tubulin and actin. (H-J) LNCaP cells from (G) immunoprecipitated for remaining subunit and immunoblotted. These precipitates were used for RT-qPCR in Fig. 7D.

**Figure S4. Defining the minimal region of DRAIC that inhibits tumorigenic property in cancer cell lines.** (A) NF-κB luciferase reporter assay was performed with 293T cells overexpressing EV, FL, E1-3 and E4-5. Mean ± s.d, n=3, *p<0.05. (B) NF-κB luciferase reporter activity was performed after co-transfection of constitutive active IKKβ and EV, FL, E1-3 and E4-5 deletion constructs in 293T cells. Mean ± s.d,n=3, *p<0.05 (C) DRAIC KO cells were stably transfected with EV, FL-DRAIC, E1-3 and E4-5 and RT-qPCR was performed to quantify the DRAIC. Mean ± s.d, n=3, *p<0.05 (D) Invasion assay was carried out with the DRAIC KO cells from (C) stably overexpressing EV, FL, E1-3 and E4-5. (E) Invasion assay was carried out in DRAIC KO clones overexpressing indicated portions of E4-5 (701-1705). (F) DRAIC KO LNCaP cells were transfected with different DRAIC deletion constructs and RT-qPCR were performed to check the DRAIC expression level. Mean ± s.d,n=3, *p<0.05.
