# Supplementary material for: Long Noncoding RNA DRAIC Inhibits Prostate Cancer Progression by Interacting with IKK to Inhibit NF-κB Activation
Source: Oxford University Press journal article supplement (doi:10.1158/0008-5472.can-19-3460), 2020-01-03
Supplement: 00085472can193460-sup-231818_2_supp_5976702_q2shdh.xlsx [file 00085472can193460-sup-231818_2_supp_5976702_q2shdh.xlsx]

## Sheet: qPCR Primer
	Name	Sequence
	APTR_F	AGGTACTGCCTTCTAACGAGC
	APTR_R	GCTGTGATACCGGCAACAGT
	GSTP1_F	CACTCAAAGCCTCCTGCCTA
	GSTP1_R	CCTTCCCATAGAGCCCAAGG
	GAPDH_F	GACAGTCAGCCGCATCTTCT
	GAPDH_R	GCGCCCAATACGACCAAATC
	TNF α_F	GCCCTACTATTCAGTGGCGA
	TNF α_R	GCTTCTTCCCACCCACAAGA
	MCP-1_F	AACGCGGTAATCGGACTCAA
	MCP-1_R	CCTCCTTCTCCGTAGCCAAA
	18S RNA_F	GTAACCCGTTGAACCCCATT
	18S RNA_R	CCATCCAATCGGTAGTAGCG
	DRAIC_1F	CAGGGAGCTGGTTCCAGGAAA
	DRAIC_1R	AGTCGAAACCCAGGTTTCTCTGC
	DRAIC_2F	AAGGCCTACCTCATTGGGCTC
	DRAIC_2R	GCTTGTTCTTTTCTGGGTCTCTCC
	DRAIC_3F	GGCACTCTACAGTGTGCAGATG
	DRAIC_3R	ACACATTGGGCCAAGGACAGA
	DRAIC_4F	CTTGGGAAATTTGAAGTGGAGTACCTG
	DRAIC_4R	TTTCATTAATGACACCTGATTTTGGAGGC
	DRAIC_5F	TGAACTTCAAAGGGCAGAGGGG
	DRAIC_5R	TTAACCCGGGTCTTCTGCGC
	GS1_F	TACTACTGCCTGCGCTACTTC
	GS1_R	AGGGCTGTAGCCGGAGCTAG
	MALAT1_F	AGTACAGCACAGTGCAGCTT
	MALAT1_R	CCCACCAATCCCAACCGTAA
	PCAT1_F	CCTCTAAGTGCCAGTGCAGG
	PCAT1_R	ATGTATCTGCGCACCCTTTGA
	SchLAP1_F	CAAGTCCTCAGGTGCCATCAA
	SchLAP1_R	GGCACTTCTTCCCCAGTCAT
	PCA3_F	AGAAACCCAGTGGCTCCTTG
	PCA3_R	CCACCCATGAGGCGTAATCA
	Linc00152_F	ATGCAGCTGAAAGATTCCCT
	Linc00152_R	AGACTGGCCAGACAAATGG

## Sheet: siRNA
	siRNA	Sequence
	si226_sense	GAGAGGGACAUUAGGAUAU [dT][dT]
	si226_antisense	AUAUCCUAAUGUCCCUCUC[dT][dT]
	SI787_sense	CGAAUUUAAGUGACGCUCA[dT][dT]
	si787_antisense	UGAGCGUCACUUAAAUUCG[dT][dT]
	sip65_sense	GAUCAAUGGCUACACAGGA[dT][dT]
	sip65 _antisense	UCCUGUGUAGCCAUUGAUC[dT][dT]

## Sheet: ChIP qPCR
	Name	Sequence
	TNF_F	ACCACAGCAATGGGTAGGAG
	TNF_R	GTCCCCATACTCGACTTCCA
	GSTP1_F	GCAGCGGTCTTAGGGAATTT
	GSTP1_R	CTTTCCCTCTTTCCCAGGTC
	IL-6_F	TGCATGACTTCAGCTTTACTC
	IL-6_R	GCAGAACCACTCTTCCTTTAC
	IL-8_F	TCACCAAATTGTGGAGCTTCAGTA T
	IL-8_R	GGCTCTTGTCCTAGA AGCTTGTGT
	MCP-1_F	CAGGCTTGTGCCGAGATGTTC
	MCP-1_R	GCCTTTGCATATATCAGACA

## Sheet: sgRNAs and Primer
	Name	Sequence
	DRAIC_CRISPR_1F	GAGTCAAGGTCTGGGGTTTGT
	DRAIC_CRISPR_1R	GGGAACTGACTTTGCTGGTG
	E2_sgRNA_S	GAGGCTACGGAAAACACTGC
	E2_sgRNA_AS	GAGGCTACGGAAAACACTGC
	E2_sgRNA_2S	GAGAGCGCGGCACGAGCCAG
	E2_sgRNA_2AS	CTGGCTCGTGCCGCGCTCTC
	E2_sgRNA_3S	GTCACCCACACGAGCCCAATG
	E2_sgRNA_3AS	GCATTGGGCTCGTGTGGGTGAC
	E4_sgRNA_1S	GGTGCGTTGGCTATGTCCGG
	E4_sgRNA_1AS	CCGGACATAGCCAACGCACC
	E4_sgRNA_2S	GTAGGTGCGTTGGCTATGTC
	E4_sgRNA_2AS	GACATAGCCAACGCACCTAC
	E4_sgRNA_3S	GTAACAACAGCGTAGGTGCGT
	E4_sgRNA_3AS	ACGCACCTACGCTGTTGTTAC

## Sheet: In vitro Transcription
	Name	Sequence
	T7-701-905_F	TAATACGACTCACTATAGGGAGATATTGTGAAACCAGCAACTTG
	878-905_R	TTCATTAATGACACCTGATTTTGGAGGC
	T7-701-1105_F	TAATACGACTCACTATAGGGAGATATTGTGAAACCAGCAACTTG
	1086-1105_R	ATGTTCATACTTCTGCTGCG
	T7-900-1705_F	TAATACGACTCACTATAGGGAGAAATGAAAATTCTGAAGAAATGCCAC
	1682-1705_R	GACAGAGACGGAGAGATTTATTTT
	T7-1100-1705_F	TAATACGACTCACTATAGGGAGAGAACATAATATGGTCCTGAATGAGG
	T7-APTR_F	TAATACGACTCACTATAGGGAGATGGCCATTTCCACATGTCAG
	APTR_R	GTACACTTCACACCTGAACAC
	T7-Luciferase_F	TAATACGACTCACTATAGGGAGAATGGAAGATGCCAAAAACATTAAG
	Luciferase_R	TTACACGGCGATCTTGCCGC

## Sheet: Primers for In fusion
	Name	Sequene
	E1-3_F	TACCGAGCTCGGATCCAGGGAGCTGGTTCCAGG
	E1-3_R	TAGATGCATGCTCGACTCAGCAAGTGTTTACACATTGGGC
	E4-5_F	TACCGAGCTCGGATCTATTGTGAAACCAGCAACTTGT
	E4-5_R	TAGATGCATGCTCGAGACAGAGACGGAGAGATTTATTTT
	701-905_F	TACCGAGCTCGGATCTATTGTGAAACCAGCAACTTGT
	701-905_R	TAGATGCATGCTCGATTCATTAATGACACCTGATTTTGGA
	701-1105_F	TACCGAGCTCGGATCTATTGTGAAACCAGCAACTTGTTC
	701-1105_R	TAGATGCATGCTCGAATGTTCATACTTCTGCTGCGTCC
	900-1705_F	TACCGAGCTCGGATCAATGAAAATTCTGAAGAAATGCCAC
	900-1705_R	TAGATGCATGCTCGAGACAGAGACGGAGAGATTTATTTT
	1100-1705_F	TACCGAGCTCGGATCGAACATAATATGGTCCTGAATGAGG
	1100-1705_R	TAGATGCATGCTCGAGACAGAGACGGAGAGATTTATTTT
